# Supplementary material for: Diagnostic Accuracy of Sentence Recall and Past Tense Measures for Identifying Children's Language Impairments
Source: PubMed Central journal article supplement — J Speech Lang Hear Res. 2019 Jun 20;62(7):2438–54. doi: 10.1044/2019_JSLHR-L-18-0388 (PMC6808358; doi:10.1044/2019_jslhr-l-18-0388), 2019-06-20
Supplement: JSLHR-62-2438-s001.pdf [file JSLHR-62-2438-s001.pdf]

**Supplemental Material S1.** School details.

| <b>Elementary school</b> | <b>School enrollment</b> | <b>Percent ethnic/racial minority</b> | <b>Percent low income</b> | <b>Total screened</b> | <b>Percent of screening sample</b> |
|--------------------------|--------------------------|---------------------------------------|---------------------------|-----------------------|------------------------------------|
| A                        | 595                      | 15%                                   | 16.55%                    | 56                    | 5.3%                               |
| B                        | 403                      | 30%                                   | 38.23%                    | 116                   | 10.9%                              |
| C                        | 196                      | 40%                                   | 32.77%                    | 69                    | 6.5%                               |
| D                        | 649                      | 18%                                   | 24.63%                    | 164                   | 15.5%                              |
| E                        | 456                      | 21%                                   | 19.87%                    | 193                   | 18.2%                              |
| F                        | 517                      | 46%                                   | 58.80%                    | 106                   | 10.0%                              |
| G                        | 1,045                    | 17%                                   | 17.00%                    | 118                   | 11.1%                              |
| H                        | 260                      | 63%                                   | 80.00%                    | 13                    | 1.2%                               |
| I                        | 505                      | 28%                                   | 22.37%                    | 147                   | 13.9%                              |
| J                        | 391                      | 60%                                   | 78.27%                    | 78                    | 7.4%                               |
