# Supplementary material for: Diagnostic Accuracy of Sentence Recall and Past Tense Measures for Identifying Children's Language Impairments
Source: PubMed Central journal article supplement — J Speech Lang Hear Res. 2019 Jun 20;62(7):2438–54. doi: 10.1044/2019_JSLHR-L-18-0388 (PMC6808358; doi:10.1044/2019_jslhr-l-18-0388), 2019-06-20
Supplement: JSLHR-62-2438-s002.pdf [file JSLHR-62-2438-s002.pdf]

**Supplemental Material S2.** Conversion table from normative sample.

**Redmond Sentence Recall Standard Score Conversion Tables: 5;0–5;11**

| <b>Ages 5;0–5;5 (N = 65; boys = 33, girls = 32)</b> |                       |                   | <b>Ages 5;6–5;11 (N = 92; boys = 47, girls = 45)</b> |                       |                   |
|-----------------------------------------------------|-----------------------|-------------------|------------------------------------------------------|-----------------------|-------------------|
| Confidence Intervals:                               |                       |                   | Confidence Intervals:                                |                       |                   |
| 68% ± 1.86                                          |                       |                   | 68% ± 1.63                                           |                       |                   |
| 90% ± 3.06                                          |                       |                   | 90% ± 2.68                                           |                       |                   |
| 95% ± 3.65                                          |                       |                   | 95% ± 3.19                                           |                       |                   |
| <b>RSR Raw Score</b>                                | <b>Standard Score</b> | <b>Percentile</b> | <b>RSR Raw Score</b>                                 | <b>Standard Score</b> | <b>Percentile</b> |
| 0                                                   | 66                    | 1                 | 0                                                    | 62                    | 1                 |
| 1                                                   | 68                    | 2                 | 1                                                    | 64                    | 1                 |
| 2                                                   | 70                    | 2                 | 2                                                    | 67                    | 1                 |
| 3                                                   | 72                    | 3                 | 3                                                    | 69                    | 2                 |
| 4                                                   | 74                    | 4                 | 4                                                    | 71                    | 3                 |
| 5                                                   | 76                    | 5                 | 5                                                    | 73                    | 4                 |
| 6                                                   | 78                    | 7                 | 6                                                    | 76                    | 5                 |
| 7                                                   | 81                    | 10                | 7                                                    | 78                    | 7                 |
| 8                                                   | 83                    | 13                | 8                                                    | 80                    | 9                 |
| 9                                                   | 85                    | 16                | 9                                                    | 82                    | 12                |
| 10                                                  | 87                    | 19                | 10                                                   | 84                    | 14                |
| 11                                                  | 89                    | 23                | 11                                                   | 87                    | 19                |
| 12                                                  | 91                    | 27                | 12                                                   | 89                    | 23                |
| 13                                                  | 93                    | 32                | 13                                                   | 91                    | 27                |
| 14                                                  | 95                    | 37                | 14                                                   | 93                    | 32                |
| 15                                                  | 97                    | 42                | 15                                                   | 96                    | 39                |
| 16                                                  | 99                    | 47                | 16                                                   | 98                    | 45                |
| 17                                                  | 101                   | 53                | 17                                                   | 100                   | 50                |
| 18                                                  | 104                   | 61                | 18                                                   | 102                   | 55                |
| 19                                                  | 106                   | 66                | 19                                                   | 105                   | 63                |
| 20                                                  | 108                   | 70                | 20                                                   | 107                   | 68                |
| 21                                                  | 110                   | 75                | 21                                                   | 109                   | 73                |
| 22                                                  | 112                   | 79                | 22                                                   | 111                   | 77                |
| 23                                                  | 114                   | 82                | 23                                                   | 114                   | 82                |
| 24                                                  | 116                   | 86                | 24                                                   | 116                   | 86                |
| 25                                                  | 118                   | 88                | 25                                                   | 118                   | 88                |
| 26                                                  | 120                   | 91                | 26                                                   | 120                   | 91                |
| 27                                                  | 122                   | 93                | 27                                                   | 123                   | 94                |
| 28                                                  | 125                   | 95                | 28                                                   | 125                   | 95                |
| 29                                                  | 127                   | 96                | 29                                                   | 127                   | 96                |
| 30                                                  | 129                   | 97                | 30                                                   | 129                   | 97                |
| 31                                                  | 131                   | 98                | 31                                                   | 131                   | 98                |
| 32                                                  | 133                   | 99                | 32                                                   | 134                   | 99                |

**Redmond Sentence Recall Standard Score Conversion Tables: 6;0–6;11**

| <b>Ages 6;0–6;5 (N = 106; boys = 46, girls = 60)</b> |                       |                   | <b>Ages 6;6–6;11 (N = 141; boys = 80, girls = 61)</b> |                       |                   |
|------------------------------------------------------|-----------------------|-------------------|-------------------------------------------------------|-----------------------|-------------------|
| Confidence Intervals:                                |                       |                   | Confidence Intervals:                                 |                       |                   |
| 68% ± 1.46                                           |                       |                   | 68% ± 1.26                                            |                       |                   |
| 90% ± 2.40                                           |                       |                   | 90% ± 2.07                                            |                       |                   |
| 95% ± 2.86                                           |                       |                   | 95% ± 2.47                                            |                       |                   |
| <b>RSR Raw Score</b>                                 | <b>Standard Score</b> | <b>Percentile</b> | <b>RSR Raw Score</b>                                  | <b>Standard Score</b> | <b>Percentile</b> |
| 0                                                    | 58                    | 0.3               | 0                                                     | 41                    | < 0.1             |
| 1                                                    | 61                    | 0.5               | 1                                                     | 44                    | < 0.1             |
| 2                                                    | 63                    | 1                 | 2                                                     | 47                    | < 0.1             |
| 3                                                    | 65                    | 1                 | 3                                                     | 49                    | < 0.1             |
| 4                                                    | 67                    | 1                 | 4                                                     | 52                    | 0.1               |
| 5                                                    | 69                    | 2                 | 5                                                     | 55                    | 0.1               |
| 6                                                    | 71                    | 3                 | 6                                                     | 57                    | 0.2               |
| 7                                                    | 73                    | 4                 | 7                                                     | 60                    | 0.4               |
| 8                                                    | 75                    | 5                 | 8                                                     | 63                    | 1                 |
| 9                                                    | 77                    | 6                 | 9                                                     | 65                    | 1                 |
| 10                                                   | 80                    | 9                 | 10                                                    | 68                    | 2                 |
| 11                                                   | 82                    | 12                | 11                                                    | 71                    | 3                 |
| 12                                                   | 84                    | 14                | 12                                                    | 74                    | 4                 |
| 13                                                   | 86                    | 18                | 13                                                    | 76                    | 5                 |
| 14                                                   | 88                    | 21                | 14                                                    | 79                    | 8                 |
| 15                                                   | 90                    | 25                | 15                                                    | 82                    | 12                |
| 16                                                   | 92                    | 30                | 16                                                    | 84                    | 14                |
| 17                                                   | 94                    | 34                | 17                                                    | 87                    | 19                |
| 18                                                   | 96                    | 39                | 18                                                    | 90                    | 25                |
| 19                                                   | 99                    | 47                | 19                                                    | 92                    | 30                |
| 20                                                   | 101                   | 53                | 20                                                    | 95                    | 37                |
| 21                                                   | 103                   | 58                | 21                                                    | 98                    | 45                |
| 22                                                   | 105                   | 63                | 22                                                    | 100                   | 50                |
| 23                                                   | 107                   | 68                | 23                                                    | 103                   | 58                |
| 24                                                   | 109                   | 73                | 24                                                    | 106                   | 66                |
| 25                                                   | 111                   | 77                | 25                                                    | 109                   | 73                |
| 26                                                   | 113                   | 81                | 26                                                    | 111                   | 77                |
| 27                                                   | 115                   | 84                | 27                                                    | 114                   | 82                |
| 28                                                   | 118                   | 88                | 28                                                    | 117                   | 87                |
| 29                                                   | 120                   | 91                | 29                                                    | 119                   | 90                |
| 30                                                   | 122                   | 93                | 30                                                    | 122                   | 93                |
| 31                                                   | 124                   | 95                | 31                                                    | 125                   | 95                |
| 32                                                   | 126                   | 96                | 32                                                    | 127                   | 96                |

**Redmond Sentence Recall Standard Score Conversion Tables: 7;0–7;11**

| <b>Ages 7;0–7;5 (N = 114; boys = 55, girls = 59)</b> |                       |                   | <b>Ages 7;6–7;11 (N = 81; boys = 46, girls = 35)</b> |                       |                   |
|------------------------------------------------------|-----------------------|-------------------|------------------------------------------------------|-----------------------|-------------------|
| Confidence Intervals:                                |                       |                   | Confidence Intervals:                                |                       |                   |
| 68% ± 1.40                                           |                       |                   | 68% ± 1.67                                           |                       |                   |
| 90% ± 2.30                                           |                       |                   | 90% ± 2.75                                           |                       |                   |
| 95% ± 2.74                                           |                       |                   | 95% ± 3.27                                           |                       |                   |
| <b>RSR Raw Score</b>                                 | <b>Standard Score</b> | <b>Percentile</b> | <b>RSR Raw Score</b>                                 | <b>Standard Score</b> | <b>Percentile</b> |
| 0                                                    | 54                    | 0.1               | 0                                                    | 40                    | < 0.1             |
| 1                                                    | 56                    | 0.2               | 1                                                    | 40                    | < 0.1             |
| 2                                                    | 58                    | 0.3               | 2                                                    | 40                    | < 0.1             |
| 3                                                    | 60                    | 0.4               | 3                                                    | 40                    | < 0.1             |
| 4                                                    | 62                    | 1                 | 4                                                    | 43                    | < 0.1             |
| 5                                                    | 64                    | 1                 | 5                                                    | 46                    | < 0.1             |
| 6                                                    | 66                    | 1                 | 6                                                    | 48                    | < 0.1             |
| 7                                                    | 68                    | 2                 | 7                                                    | 51                    | 0.1               |
| 8                                                    | 70                    | 2                 | 8                                                    | 54                    | 0.1               |
| 9                                                    | 72                    | 3                 | 9                                                    | 57                    | 0.2               |
| 10                                                   | 75                    | 5                 | 10                                                   | 60                    | 0.4               |
| 11                                                   | 77                    | 6                 | 11                                                   | 63                    | 1                 |
| 12                                                   | 79                    | 8                 | 12                                                   | 66                    | 1                 |
| 13                                                   | 81                    | 10                | 13                                                   | 69                    | 2                 |
| 14                                                   | 83                    | 13                | 14                                                   | 72                    | 3                 |
| 15                                                   | 85                    | 16                | 15                                                   | 75                    | 5                 |
| 16                                                   | 87                    | 19                | 16                                                   | 77                    | 6                 |
| 17                                                   | 89                    | 23                | 17                                                   | 80                    | 9                 |
| 18                                                   | 91                    | 27                | 18                                                   | 83                    | 13                |
| 19                                                   | 93                    | 32                | 19                                                   | 86                    | 18                |
| 20                                                   | 95                    | 37                | 20                                                   | 89                    | 23                |
| 21                                                   | 98                    | 45                | 21                                                   | 92                    | 30                |
| 22                                                   | 100                   | 50                | 22                                                   | 95                    | 37                |
| 23                                                   | 102                   | 55                | 23                                                   | 98                    | 45                |
| 24                                                   | 104                   | 61                | 24                                                   | 101                   | 53                |
| 25                                                   | 106                   | 66                | 25                                                   | 103                   | 58                |
| 26                                                   | 108                   | 70                | 26                                                   | 106                   | 66                |
| 27                                                   | 110                   | 75                | 27                                                   | 109                   | 73                |
| 28                                                   | 112                   | 79                | 28                                                   | 112                   | 79                |
| 29                                                   | 114                   | 82                | 29                                                   | 115                   | 84                |
| 30                                                   | 116                   | 86                | 30                                                   | 118                   | 88                |
| 31                                                   | 119                   | 90                | 31                                                   | 121                   | 92                |
| 32                                                   | 121                   | 92                | 32                                                   | 124                   | 95                |

**Redmond Sentence Recall Standard Score Conversion Tables: 8;0–8;11**

| <b>Ages 8;0–8;5 (N = 84; boys = 40, girls = 44)</b>             |                       |                   | <b>Ages 8;6–8;11 (N = 73; boys = 45, girls = 28)</b>            |                       |                   |
|-----------------------------------------------------------------|-----------------------|-------------------|-----------------------------------------------------------------|-----------------------|-------------------|
| Confidence Intervals:<br>68% ± 1.63<br>90% ± 2.68<br>95% ± 3.19 |                       |                   | Confidence Intervals:<br>68% ± 1.76<br>90% ± 2.89<br>95% ± 3.45 |                       |                   |
| <b>RSR Raw Score</b>                                            | <b>Standard Score</b> | <b>Percentile</b> | <b>RSR Raw Score</b>                                            | <b>Standard Score</b> | <b>Percentile</b> |
| 0                                                               | 40                    | < 0.1             | 0                                                               | 40                    | < 0.1             |
| 1                                                               | 40                    | < 0.1             | 1                                                               | 40                    | < 0.1             |
| 2                                                               | 40                    | < 0.1             | 2                                                               | 40                    | < 0.1             |
| 3                                                               | 40                    | < 0.1             | 3                                                               | 40                    | < 0.1             |
| 4                                                               | 40                    | < 0.1             | 4                                                               | 40                    | < 0.1             |
| 5                                                               | 40                    | < 0.1             | 5                                                               | 40                    | < 0.1             |
| 6                                                               | 40                    | < 0.1             | 6                                                               | 40                    | < 0.1             |
| 7                                                               | 41                    | < 0.1             | 7                                                               | 41                    | < 0.1             |
| 8                                                               | 44                    | < 0.1             | 8                                                               | 44                    | < 0.1             |
| 9                                                               | 47                    | < 0.1             | 9                                                               | 47                    | < 0.1             |
| 10                                                              | 50                    | < 0.1             | 10                                                              | 50                    | < 0.1             |
| 11                                                              | 54                    | 0.1               | 11                                                              | 53                    | 0.1               |
| 12                                                              | 57                    | 0.2               | 12                                                              | 56                    | 0.2               |
| 13                                                              | 60                    | 0.4               | 13                                                              | 59                    | 0.3               |
| 14                                                              | 63                    | 1                 | 14                                                              | 63                    | 1                 |
| 15                                                              | 66                    | 1                 | 15                                                              | 66                    | 1                 |
| 16                                                              | 69                    | 2                 | 16                                                              | 69                    | 2                 |
| 17                                                              | 72                    | 3                 | 17                                                              | 72                    | 3                 |
| 18                                                              | 76                    | 5                 | 18                                                              | 75                    | 5                 |
| 19                                                              | 79                    | 8                 | 19                                                              | 78                    | 7                 |
| 20                                                              | 82                    | 12                | 20                                                              | 82                    | 12                |
| 21                                                              | 85                    | 16                | 21                                                              | 85                    | 16                |
| 22                                                              | 88                    | 21                | 22                                                              | 88                    | 21                |
| 23                                                              | 91                    | 27                | 23                                                              | 91                    | 27                |
| 24                                                              | 94                    | 34                | 24                                                              | 94                    | 34                |
| 25                                                              | 98                    | 45                | 25                                                              | 97                    | 42                |
| 26                                                              | 101                   | 53                | 26                                                              | 100                   | 50                |
| 27                                                              | 104                   | 61                | 27                                                              | 104                   | 61                |
| 28                                                              | 107                   | 68                | 28                                                              | 107                   | 68                |
| 29                                                              | 110                   | 75                | 29                                                              | 110                   | 75                |
| 30                                                              | 113                   | 81                | 30                                                              | 113                   | 81                |
| 31                                                              | 116                   | 86                | 31                                                              | 116                   | 86                |
| 32                                                              | 119                   | 90                | 32                                                              | 119                   | 90                |

### Redmond Sentence Recall Standard Score Conversion Tables: 9;0–9;5

**Ages 9;0–9;5 (N = 26; boys = 15, girls = 11)**

Confidence Intervals:

68% ± 2.94

90% ± 4.84

95% ± 5.76

| <b>RSR Raw Score</b> | <b>Standard Score</b> | <b>Percentile</b> |
|----------------------|-----------------------|-------------------|
| 0                    | 40                    | < 0.1             |
| 1                    | 40                    | < 0.1             |
| 2                    | 40                    | < 0.1             |
| 3                    | 40                    | < 0.1             |
| 4                    | 40                    | < 0.1             |
| 5                    | 40                    | < 0.1             |
| 6                    | 40                    | < 0.1             |
| 7                    | 40                    | < 0.1             |
| 8                    | 40                    | < 0.1             |
| 9                    | 40                    | < 0.1             |
| 10                   | 40                    | < 0.1             |
| 11                   | 40                    | < 0.1             |
| 12                   | 40                    | < 0.1             |
| 13                   | 40                    | < 0.1             |
| 14                   | 40                    | < 0.1             |
| 15                   | 40                    | < 0.1             |
| 16                   | 40                    | < 0.1             |
| 17                   | 41                    | < 0.1             |
| 18                   | 47                    | < 0.1             |
| 19                   | 52                    | 0.1               |
| 20                   | 58                    | 0.3               |
| 21                   | 64                    | 1                 |
| 22                   | 70                    | 2                 |
| 23                   | 76                    | 5                 |
| 24                   | 82                    | 12                |
| 25                   | 88                    | 21                |
| 26                   | 94                    | 34                |
| 27                   | 100                   | 50                |
| 28                   | 106                   | 66                |
| 29                   | 112                   | 79                |
| 30                   | 117                   | 87                |
| 31                   | 123                   | 94                |
| 32                   | 129                   | 97                |

### Past Tense Probe Standard Score Conversion Tables: 5;0–5;5

**Ages 5;0–5;5 (N = 65; boys = 33, girls = 32)**

Confidence Intervals:

68% ± 1.86

90% ± 3.06

95% ± 3.65

| Past Tense Raw Score | Standard Score | Percentile | Past Tense Raw Score | Standard Score | Percentile | Past Tense Raw Score | Standard Score | Percentile |
|----------------------|----------------|------------|----------------------|----------------|------------|----------------------|----------------|------------|
| 0                    | 40             | < 0.1      | 33                   | 45             | < 0.1      | 66                   | 76             | 5          |
| 1                    | 40             | < 0.1      | 34                   | 46             | < 0.1      | 67                   | 77             | 6          |
| 2                    | 40             | < 0.1      | 35                   | 47             | < 0.1      | 68                   | 78             | 7          |
| 3                    | 40             | < 0.1      | 36                   | 48             | < 0.1      | 69                   | 79             | 8          |
| 4                    | 40             | < 0.1      | 37                   | 49             | < 0.1      | 70                   | 80             | 9          |
| 5                    | 40             | < 0.1      | 38                   | 50             | < 0.1      | 71                   | 81             | 10         |
| 6                    | 40             | < 0.1      | 39                   | 51             | 0.1        | 72                   | 82             | 12         |
| 7                    | 40             | < 0.1      | 40                   | 52             | 0.1        | 73                   | 83             | 13         |
| 8                    | 40             | < 0.1      | 41                   | 53             | 0.1        | 74                   | 84             | 14         |
| 9                    | 40             | < 0.1      | 42                   | 54             | 0.1        | 75                   | 85             | 16         |
| 10                   | 40             | < 0.1      | 43                   | 55             | 0.1        | 76                   | 86             | 18         |
| 11                   | 40             | < 0.1      | 44                   | 56             | 0.2        | 77                   | 87             | 19         |
| 12                   | 40             | < 0.1      | 45                   | 56             | 0.2        | 78                   | 88             | 21         |
| 13                   | 40             | < 0.1      | 46                   | 57             | 0.2        | 79                   | 89             | 23         |
| 14                   | 40             | < 0.1      | 47                   | 58             | 0.3        | 80                   | 90             | 25         |
| 15                   | 40             | < 0.1      | 48                   | 59             | 0.3        | 81                   | 90             | 25         |
| 16                   | 40             | < 0.1      | 49                   | 60             | 0.4        | 82                   | 91             | 27         |
| 17                   | 40             | < 0.1      | 50                   | 61             | 0.5        | 83                   | 92             | 30         |
| 18                   | 40             | < 0.1      | 51                   | 62             | 1          | 84                   | 93             | 32         |
| 19                   | 40             | < 0.1      | 52                   | 63             | 1          | 85                   | 94             | 34         |
| 20                   | 40             | < 0.1      | 53                   | 64             | 1          | 86                   | 95             | 37         |
| 21                   | 40             | < 0.1      | 54                   | 65             | 1          | 87                   | 96             | 39         |
| 22                   | 40             | < 0.1      | 55                   | 66             | 1          | 88                   | 97             | 42         |
| 23                   | 40             | < 0.1      | 56                   | 67             | 1          | 89                   | 98             | 45         |
| 24                   | 40             | < 0.1      | 57                   | 68             | 2          | 90                   | 99             | 47         |
| 25                   | 40             | < 0.1      | 58                   | 69             | 2          | 91                   | 100            | 50         |
| 26                   | 40             | < 0.1      | 59                   | 70             | 2          | 92                   | 101            | 53         |
| 27                   | 40             | < 0.1      | 60                   | 71             | 3          | 93                   | 102            | 55         |
| 28                   | 40             | < 0.1      | 61                   | 72             | 3          | 94                   | 103            | 58         |
| 29                   | 41             | < 0.1      | 62                   | 73             | 4          | 95                   | 104            | 61         |
| 30                   | 42             | < 0.1      | 63                   | 73             | 4          | 96                   | 105            | 63         |
| 31                   | 43             | < 0.1      | 64                   | 74             | 4          | 97                   | 106            | 66         |
| 32                   | 44             | < 0.1      | 65                   | 75             | 5          | 98                   | 107            | 68         |
|                      |                |            |                      |                |            | 99                   | 107            | 68         |
|                      |                |            |                      |                |            | 100                  | 108            | 70         |

**Past Tense Probe Standard Score Conversion Tables: 5;6–5;11**

**Ages 5;6–5;11 (N = 92; boys = 47, girls = 45)**

Confidence Intervals:

68% ± 1.56

90% ± 2.57

95% ± 3.06

| Past Tense Raw Score | Standard Score | Percentile | Past Tense Raw Score | Standard Score | Percentile | Past Tense Raw Score | Standard Score | Percentile |
|----------------------|----------------|------------|----------------------|----------------|------------|----------------------|----------------|------------|
| 0                    | 40             | < 0.1      | 33                   | 45             | < 0.1      | 66                   | 76             | 5          |
| 1                    | 40             | < 0.1      | 34                   | 46             | < 0.1      | 67                   | 77             | 6          |
| 2                    | 40             | < 0.1      | 35                   | 47             | < 0.1      | 68                   | 78             | 7          |
| 3                    | 40             | < 0.1      | 36                   | 48             | < 0.1      | 69                   | 79             | 8          |
| 4                    | 40             | < 0.1      | 37                   | 49             | < 0.1      | 70                   | 80             | 9          |
| 5                    | 40             | < 0.1      | 38                   | 50             | < 0.1      | 71                   | 81             | 10         |
| 6                    | 40             | < 0.1      | 39                   | 51             | 0.1        | 72                   | 82             | 12         |
| 7                    | 40             | < 0.1      | 40                   | 52             | 0.1        | 73                   | 83             | 13         |
| 8                    | 40             | < 0.1      | 41                   | 53             | 0.1        | 74                   | 84             | 14         |
| 9                    | 40             | < 0.1      | 42                   | 53             | 0.1        | 75                   | 85             | 16         |
| 10                   | 40             | < 0.1      | 43                   | 54             | 0.1        | 76                   | 86             | 18         |
| 11                   | 40             | < 0.1      | 44                   | 55             | 0.1        | 77                   | 87             | 19         |
| 12                   | 40             | < 0.1      | 45                   | 56             | 0.2        | 78                   | 88             | 21         |
| 13                   | 40             | < 0.1      | 46                   | 57             | 0.2        | 79                   | 89             | 23         |
| 14                   | 40             | < 0.1      | 47                   | 58             | 0.3        | 80                   | 90             | 25         |
| 15                   | 40             | < 0.1      | 48                   | 59             | 0.3        | 81                   | 91             | 27         |
| 16                   | 40             | < 0.1      | 49                   | 60             | 0.4        | 82                   | 92             | 30         |
| 17                   | 40             | < 0.1      | 50                   | 61             | 0.5        | 83                   | 93             | 32         |
| 18                   | 40             | < 0.1      | 51                   | 62             | 1          | 84                   | 94             | 34         |
| 19                   | 40             | < 0.1      | 52                   | 63             | 1          | 85                   | 95             | 37         |
| 20                   | 40             | < 0.1      | 53                   | 64             | 1          | 86                   | 96             | 39         |
| 21                   | 40             | < 0.1      | 54                   | 65             | 1          | 87                   | 97             | 42         |
| 22                   | 40             | < 0.1      | 55                   | 66             | 1          | 88                   | 97             | 42         |
| 23                   | 40             | < 0.1      | 56                   | 67             | 1          | 89                   | 98             | 45         |
| 24                   | 40             | < 0.1      | 57                   | 68             | 2          | 90                   | 99             | 47         |
| 25                   | 40             | < 0.1      | 58                   | 69             | 2          | 91                   | 100            | 50         |
| 26                   | 40             | < 0.1      | 59                   | 70             | 2          | 92                   | 101            | 53         |
| 27                   | 40             | < 0.1      | 60                   | 71             | 3          | 93                   | 102            | 55         |
| 28                   | 40             | < 0.1      | 61                   | 72             | 3          | 94                   | 103            | 58         |
| 29                   | 41             | < 0.1      | 62                   | 73             | 4          | 95                   | 104            | 61         |
| 30                   | 42             | < 0.1      | 63                   | 74             | 4          | 96                   | 105            | 63         |
| 31                   | 43             | < 0.1      | 64                   | 75             | 5          | 97                   | 106            | 66         |
| 32                   | 44             | < 0.1      | 65                   | 75             | 5          | 98                   | 107            | 68         |
|                      |                |            |                      |                |            | 99                   | 108            | 70         |
|                      |                |            |                      |                |            | 100                  | 109            | 73         |

**Past Tense Probe Standard Score Conversion Tables: 6;0–6;5**

**Ages 6;0–6;5 (N = 106; boys = 46, girls = 60)**

Confidence Intervals:

68% ± 1.46

90% ± 2.40

95% ± 2.86

| Past Tense Raw Score | Standard Score | Percentile | Past Tense Raw Score | Standard Score | Percentile | Past Tense Raw Score | Standard Score | Percentile |
|----------------------|----------------|------------|----------------------|----------------|------------|----------------------|----------------|------------|
| 0                    | 40             | < 0.1      | 33                   | 40             | < 0.1      | 66                   | 71             | 3          |
| 1                    | 40             | < 0.1      | 34                   | 40             | < 0.1      | 67                   | 73             | 4          |
| 2                    | 40             | < 0.1      | 35                   | 40             | < 0.1      | 68                   | 74             | 4          |
| 3                    | 40             | < 0.1      | 36                   | 40             | < 0.1      | 69                   | 75             | 5          |
| 4                    | 40             | < 0.1      | 37                   | 40             | < 0.1      | 70                   | 76             | 5          |
| 5                    | 40             | < 0.1      | 38                   | 41             | < 0.1      | 71                   | 77             | 6          |
| 6                    | 40             | < 0.1      | 39                   | 42             | < 0.1      | 72                   | 78             | 7          |
| 7                    | 40             | < 0.1      | 40                   | 43             | < 0.1      | 73                   | 79             | 8          |
| 8                    | 40             | < 0.1      | 41                   | 44             | < 0.1      | 74                   | 80             | 9          |
| 9                    | 40             | < 0.1      | 42                   | 45             | < 0.1      | 75                   | 81             | 10         |
| 10                   | 40             | < 0.1      | 43                   | 46             | < 0.1      | 76                   | 82             | 12         |
| 11                   | 40             | < 0.1      | 44                   | 47             | < 0.1      | 77                   | 83             | 13         |
| 12                   | 40             | < 0.1      | 45                   | 49             | < 0.1      | 78                   | 85             | 16         |
| 13                   | 40             | < 0.1      | 46                   | 50             | < 0.1      | 79                   | 86             | 18         |
| 14                   | 40             | < 0.1      | 47                   | 51             | 0.1        | 80                   | 87             | 19         |
| 15                   | 40             | < 0.1      | 48                   | 52             | 0.1        | 81                   | 88             | 21         |
| 16                   | 40             | < 0.1      | 49                   | 53             | 0.1        | 82                   | 89             | 23         |
| 17                   | 40             | < 0.1      | 50                   | 54             | 0.1        | 83                   | 90             | 25         |
| 18                   | 40             | < 0.1      | 51                   | 55             | 0.1        | 84                   | 91             | 27         |
| 19                   | 40             | < 0.1      | 52                   | 56             | 0.2        | 85                   | 92             | 30         |
| 20                   | 40             | < 0.1      | 53                   | 57             | 0.2        | 86                   | 93             | 32         |
| 21                   | 40             | < 0.1      | 54                   | 58             | 0.3        | 87                   | 94             | 34         |
| 22                   | 40             | < 0.1      | 55                   | 59             | 0.3        | 88                   | 95             | 37         |
| 23                   | 40             | < 0.1      | 56                   | 61             | 0.5        | 89                   | 96             | 39         |
| 24                   | 40             | < 0.1      | 57                   | 62             | 1          | 90                   | 98             | 45         |
| 25                   | 40             | < 0.1      | 58                   | 63             | 1          | 91                   | 99             | 47         |
| 26                   | 40             | < 0.1      | 59                   | 64             | 1          | 92                   | 100            | 50         |
| 27                   | 40             | < 0.1      | 60                   | 65             | 1          | 93                   | 101            | 53         |
| 28                   | 40             | < 0.1      | 61                   | 66             | 1          | 94                   | 102            | 55         |
| 29                   | 40             | < 0.1      | 62                   | 67             | 1          | 95                   | 103            | 58         |
| 30                   | 40             | < 0.1      | 63                   | 68             | 2          | 96                   | 104            | 61         |
| 31                   | 40             | < 0.1      | 64                   | 69             | 2          | 97                   | 105            | 63         |
| 32                   | 40             | < 0.1      | 65                   | 70             | 2          | 98                   | 106            | 66         |
|                      |                |            |                      |                |            | 99                   | 107            | 68         |
|                      |                |            |                      |                |            | 100                  | 108            | 70         |



**Past Tense Probe Standard Score Conversion Tables: 6;6–6;11**

**Ages 6;6–6;11 (N = 141; boys = 80, girls = 61)**

Confidence Intervals:

68% ± 1.26

90% ± 2.07

95% ± 2.47

| Past Tense Raw Score | Standard Score | Percentile | Past Tense Raw Score | Standard Score | Percentile | Past Tense Raw Score | Standard Score | Percentile |
|----------------------|----------------|------------|----------------------|----------------|------------|----------------------|----------------|------------|
| 0                    | 40             | < 0.1      | 33                   | 40             | < 0.1      | 66                   | 43             | < 0.1      |
| 1                    | 40             | < 0.1      | 34                   | 40             | < 0.1      | 67                   | 45             | < 0.1      |
| 2                    | 40             | < 0.1      | 35                   | 40             | < 0.1      | 68                   | 47             | < 0.1      |
| 3                    | 40             | < 0.1      | 36                   | 40             | < 0.1      | 69                   | 49             | < 0.1      |
| 4                    | 40             | < 0.1      | 37                   | 40             | < 0.1      | 70                   | 51             | 0.1        |
| 5                    | 40             | < 0.1      | 38                   | 40             | < 0.1      | 71                   | 53             | 0.1        |
| 6                    | 40             | < 0.1      | 39                   | 40             | < 0.1      | 72                   | 55             | 0.1        |
| 7                    | 40             | < 0.1      | 40                   | 40             | < 0.1      | 73                   | 57             | 0.2        |
| 8                    | 40             | < 0.1      | 41                   | 40             | < 0.1      | 74                   | 59             | 0.3        |
| 9                    | 40             | < 0.1      | 42                   | 40             | < 0.1      | 75                   | 61             | 0.5        |
| 10                   | 40             | < 0.1      | 43                   | 40             | < 0.1      | 76                   | 63             | 1          |
| 11                   | 40             | < 0.1      | 44                   | 40             | < 0.1      | 77                   | 65             | 1          |
| 12                   | 40             | < 0.1      | 45                   | 40             | < 0.1      | 78                   | 66             | 1          |
| 13                   | 40             | < 0.1      | 46                   | 40             | < 0.1      | 79                   | 68             | 2          |
| 14                   | 40             | < 0.1      | 47                   | 40             | < 0.1      | 80                   | 70             | 2          |
| 15                   | 40             | < 0.1      | 48                   | 40             | < 0.1      | 81                   | 72             | 3          |
| 16                   | 40             | < 0.1      | 49                   | 40             | < 0.1      | 82                   | 74             | 4          |
| 17                   | 40             | < 0.1      | 50                   | 40             | < 0.1      | 83                   | 76             | 5          |
| 18                   | 40             | < 0.1      | 51                   | 40             | < 0.1      | 84                   | 78             | 7          |
| 19                   | 40             | < 0.1      | 52                   | 40             | < 0.1      | 85                   | 80             | 9          |
| 20                   | 40             | < 0.1      | 53                   | 40             | < 0.1      | 86                   | 82             | 12         |
| 21                   | 40             | < 0.1      | 54                   | 40             | < 0.1      | 87                   | 84             | 14         |
| 22                   | 40             | < 0.1      | 55                   | 40             | < 0.1      | 88                   | 86             | 18         |
| 23                   | 40             | < 0.1      | 56                   | 40             | < 0.1      | 89                   | 88             | 21         |
| 24                   | 40             | < 0.1      | 57                   | 40             | < 0.1      | 90                   | 90             | 25         |
| 25                   | 40             | < 0.1      | 58                   | 40             | < 0.1      | 91                   | 92             | 30         |
| 26                   | 40             | < 0.1      | 59                   | 40             | < 0.1      | 92                   | 94             | 34         |
| 27                   | 40             | < 0.1      | 60                   | 40             | < 0.1      | 93                   | 96             | 39         |
| 28                   | 40             | < 0.1      | 61                   | 40             | < 0.1      | 94                   | 98             | 45         |
| 29                   | 40             | < 0.1      | 62                   | 40             | < 0.1      | 95                   | 100            | 50         |
| 30                   | 40             | < 0.1      | 63                   | 40             | < 0.1      | 96                   | 102            | 55         |
| 31                   | 40             | < 0.1      | 64                   | 40             | < 0.1      | 97                   | 104            | 61         |
| 32                   | 40             | < 0.1      | 65                   | 41             | < 0.1      | 98                   | 106            | 66         |
|                      |                |            |                      |                |            | 99                   | 108            | 70         |
|                      |                |            |                      |                |            | 100                  | 110            | 75         |

### Past Tense Probe Standard Score Conversion Tables: 7;0–7;5

**Ages 7;0–7;5 (N = 114; boys = 55, girls = 59)**

Confidence Intervals:

68% ± 1.40

90% ± 2.30

95% ± 2.74

| Past Tense Raw Score | Standard Score | Percentile | Past Tense Raw Score | Standard Score | Percentile | Past Tense Raw Score | Standard Score | Percentile |
|----------------------|----------------|------------|----------------------|----------------|------------|----------------------|----------------|------------|
| 0                    | 40             | < 0.1      | 33                   | 40             | < 0.1      | 66                   | 59             | 0.3        |
| 1                    | 40             | < 0.1      | 34                   | 40             | < 0.1      | 67                   | 61             | 0.5        |
| 2                    | 40             | < 0.1      | 35                   | 40             | < 0.1      | 68                   | 62             | 1          |
| 3                    | 40             | < 0.1      | 36                   | 40             | < 0.1      | 69                   | 64             | 1          |
| 4                    | 40             | < 0.1      | 37                   | 40             | < 0.1      | 70                   | 65             | 1          |
| 5                    | 40             | < 0.1      | 38                   | 40             | < 0.1      | 71                   | 66             | 1          |
| 6                    | 40             | < 0.1      | 39                   | 40             | < 0.1      | 72                   | 68             | 2          |
| 7                    | 40             | < 0.1      | 40                   | 40             | < 0.1      | 73                   | 69             | 2          |
| 8                    | 40             | < 0.1      | 41                   | 40             | < 0.1      | 74                   | 71             | 3          |
| 9                    | 40             | < 0.1      | 42                   | 40             | < 0.1      | 75                   | 72             | 3          |
| 10                   | 40             | < 0.1      | 43                   | 40             | < 0.1      | 76                   | 74             | 4          |
| 11                   | 40             | < 0.1      | 44                   | 40             | < 0.1      | 77                   | 75             | 5          |
| 12                   | 40             | < 0.1      | 45                   | 40             | < 0.1      | 78                   | 76             | 5          |
| 13                   | 40             | < 0.1      | 46                   | 40             | < 0.1      | 79                   | 78             | 7          |
| 14                   | 40             | < 0.1      | 47                   | 40             | < 0.1      | 80                   | 79             | 8          |
| 15                   | 40             | < 0.1      | 48                   | 40             | < 0.1      | 81                   | 81             | 10         |
| 16                   | 40             | < 0.1      | 49                   | 40             | < 0.1      | 82                   | 82             | 12         |
| 17                   | 40             | < 0.1      | 50                   | 40             | < 0.1      | 83                   | 83             | 13         |
| 18                   | 40             | < 0.1      | 51                   | 40             | < 0.1      | 84                   | 85             | 16         |
| 19                   | 40             | < 0.1      | 52                   | 40             | < 0.1      | 85                   | 86             | 18         |
| 20                   | 40             | < 0.1      | 53                   | 41             | < 0.1      | 86                   | 88             | 21         |
| 21                   | 40             | < 0.1      | 54                   | 43             | < 0.1      | 87                   | 89             | 23         |
| 22                   | 40             | < 0.1      | 55                   | 44             | < 0.1      | 88                   | 90             | 25         |
| 23                   | 40             | < 0.1      | 56                   | 45             | < 0.1      | 89                   | 92             | 30         |
| 24                   | 40             | < 0.1      | 57                   | 47             | < 0.1      | 90                   | 93             | 32         |
| 25                   | 40             | < 0.1      | 58                   | 48             | < 0.1      | 91                   | 95             | 37         |
| 26                   | 40             | < 0.1      | 59                   | 50             | < 0.1      | 92                   | 96             | 39         |
| 27                   | 40             | < 0.1      | 60                   | 51             | 0.1        | 93                   | 97             | 42         |
| 28                   | 40             | < 0.1      | 61                   | 52             | 0.1        | 94                   | 99             | 47         |
| 29                   | 40             | < 0.1      | 62                   | 54             | 0.1        | 95                   | 100            | 50         |
| 30                   | 40             | < 0.1      | 63                   | 55             | 0.1        | 96                   | 102            | 55         |
| 31                   | 40             | < 0.1      | 64                   | 57             | 0.2        | 97                   | 103            | 58         |
| 32                   | 40             | < 0.1      | 65                   | 58             | 0.3        | 98                   | 104            | 61         |
|                      |                |            |                      |                |            | 99                   | 106            | 66         |
|                      |                |            |                      |                |            | 100                  | 107            | 68         |

**Past Tense Probe Standard Score Conversion Tables: 7;6–7;11**

**Ages 7;6–7;11 (N = 81; boys = 46, girls = 35)**

Confidence Intervals:

68% ± 1.67

90% ± 2.74

95% ± 3.27

| Past Tense Raw Score | Standard Score | Percentile | Past Tense Raw Score | Standard Score | Percentile | Past Tense Raw Score | Standard Score | Percentile |
|----------------------|----------------|------------|----------------------|----------------|------------|----------------------|----------------|------------|
| 0                    | 40             | < 0.1      | 33                   | 40             | < 0.1      | 66                   | 43             | < 0.1      |
| 1                    | 40             | < 0.1      | 34                   | 40             | < 0.1      | 67                   | 45             | < 0.1      |
| 2                    | 40             | < 0.1      | 35                   | 40             | < 0.1      | 68                   | 47             | < 0.1      |
| 3                    | 40             | < 0.1      | 36                   | 40             | < 0.1      | 69                   | 49             | < 0.1      |
| 4                    | 40             | < 0.1      | 37                   | 40             | < 0.1      | 70                   | 51             | 0.1        |
| 5                    | 40             | < 0.1      | 38                   | 40             | < 0.1      | 71                   | 53             | 0.1        |
| 6                    | 40             | < 0.1      | 39                   | 40             | < 0.1      | 72                   | 54             | 0.1        |
| 7                    | 40             | < 0.1      | 40                   | 40             | < 0.1      | 73                   | 56             | 0.2        |
| 8                    | 40             | < 0.1      | 41                   | 40             | < 0.1      | 74                   | 58             | 0.3        |
| 9                    | 40             | < 0.1      | 42                   | 40             | < 0.1      | 75                   | 60             | 0.4        |
| 10                   | 40             | < 0.1      | 43                   | 40             | < 0.1      | 76                   | 62             | 1          |
| 11                   | 40             | < 0.1      | 44                   | 40             | < 0.1      | 77                   | 64             | 1          |
| 12                   | 40             | < 0.1      | 45                   | 40             | < 0.1      | 78                   | 66             | 1          |
| 13                   | 40             | < 0.1      | 46                   | 40             | < 0.1      | 79                   | 68             | 2          |
| 14                   | 40             | < 0.1      | 47                   | 40             | < 0.1      | 80                   | 70             | 2          |
| 15                   | 40             | < 0.1      | 48                   | 40             | < 0.1      | 81                   | 72             | 3          |
| 16                   | 40             | < 0.1      | 49                   | 40             | < 0.1      | 82                   | 74             | 4          |
| 17                   | 40             | < 0.1      | 50                   | 40             | < 0.1      | 83                   | 76             | 5          |
| 18                   | 40             | < 0.1      | 51                   | 40             | < 0.1      | 84                   | 78             | 7          |
| 19                   | 40             | < 0.1      | 52                   | 40             | < 0.1      | 85                   | 80             | 9          |
| 20                   | 40             | < 0.1      | 53                   | 40             | < 0.1      | 86                   | 82             | 12         |
| 21                   | 40             | < 0.1      | 54                   | 40             | < 0.1      | 87                   | 83             | 13         |
| 22                   | 40             | < 0.1      | 55                   | 40             | < 0.1      | 88                   | 85             | 16         |
| 23                   | 40             | < 0.1      | 56                   | 40             | < 0.1      | 89                   | 87             | 19         |
| 24                   | 40             | < 0.1      | 57                   | 40             | < 0.1      | 90                   | 89             | 23         |
| 25                   | 40             | < 0.1      | 58                   | 40             | < 0.1      | 91                   | 91             | 27         |
| 26                   | 40             | < 0.1      | 59                   | 40             | < 0.1      | 92                   | 93             | 32         |
| 27                   | 40             | < 0.1      | 60                   | 40             | < 0.1      | 93                   | 95             | 37         |
| 28                   | 40             | < 0.1      | 61                   | 40             | < 0.1      | 94                   | 97             | 42         |
| 29                   | 40             | < 0.1      | 62                   | 40             | < 0.1      | 95                   | 99             | 47         |
| 30                   | 40             | < 0.1      | 63                   | 40             | < 0.1      | 96                   | 101            | 53         |
| 31                   | 40             | < 0.1      | 64                   | 40             | < 0.1      | 97                   | 103            | 58         |
| 32                   | 40             | < 0.1      | 65                   | 41             | < 0.1      | 98                   | 105            | 63         |
|                      |                |            |                      |                |            | 99                   | 107            | 68         |
|                      |                |            |                      |                |            | 100                  | 109            | 73         |

**Past Tense Probe Standard Score Conversion Tables: 8;0–8;5**

**Ages 8;0–8;5 (N = 84; boys = 40, girls = 44)**

Confidence Intervals:

68% ± 1.64

90% ± 2.69

95% ± 3.21

| Past Tense Raw Score | Standard Score | Percentile | Past Tense Raw Score | Standard Score | Percentile | Past Tense Raw Score | Standard Score | Percentile |
|----------------------|----------------|------------|----------------------|----------------|------------|----------------------|----------------|------------|
| 0                    | 40             | < 0.1      | 33                   | 40             | < 0.1      | 66                   | 40             | < 0.1      |
| 1                    | 40             | < 0.1      | 34                   | 40             | < 0.1      | 67                   | 40             | < 0.1      |
| 2                    | 40             | < 0.1      | 35                   | 40             | < 0.1      | 68                   | 40             | < 0.1      |
| 3                    | 40             | < 0.1      | 36                   | 40             | < 0.1      | 69                   | 40             | < 0.1      |
| 4                    | 40             | < 0.1      | 37                   | 40             | < 0.1      | 70                   | 40             | < 0.1      |
| 5                    | 40             | < 0.1      | 38                   | 40             | < 0.1      | 71                   | 40             | < 0.1      |
| 6                    | 40             | < 0.1      | 39                   | 40             | < 0.1      | 72                   | 40             | < 0.1      |
| 7                    | 40             | < 0.1      | 40                   | 40             | < 0.1      | 73                   | 40             | < 0.1      |
| 8                    | 40             | < 0.1      | 41                   | 40             | < 0.1      | 74                   | 40             | < 0.1      |
| 9                    | 40             | < 0.1      | 42                   | 40             | < 0.1      | 75                   | 41             | < 0.1      |
| 10                   | 40             | < 0.1      | 43                   | 40             | < 0.1      | 76                   | 44             | < 0.1      |
| 11                   | 40             | < 0.1      | 44                   | 40             | < 0.1      | 77                   | 46             | < 0.1      |
| 12                   | 40             | < 0.1      | 45                   | 40             | < 0.1      | 78                   | 49             | < 0.1      |
| 13                   | 40             | < 0.1      | 46                   | 40             | < 0.1      | 79                   | 51             | 0.1        |
| 14                   | 40             | < 0.1      | 47                   | 40             | < 0.1      | 80                   | 54             | 0.1        |
| 15                   | 40             | < 0.1      | 48                   | 40             | < 0.1      | 81                   | 57             | 0.2        |
| 16                   | 40             | < 0.1      | 49                   | 40             | < 0.1      | 82                   | 59             | 0.3        |
| 17                   | 40             | < 0.1      | 50                   | 40             | < 0.1      | 83                   | 62             | 1          |
| 18                   | 40             | < 0.1      | 51                   | 40             | < 0.1      | 84                   | 64             | 1          |
| 19                   | 40             | < 0.1      | 52                   | 40             | < 0.1      | 85                   | 67             | 1          |
| 20                   | 40             | < 0.1      | 53                   | 40             | < 0.1      | 86                   | 70             | 2          |
| 21                   | 40             | < 0.1      | 54                   | 40             | < 0.1      | 87                   | 72             | 3          |
| 22                   | 40             | < 0.1      | 55                   | 40             | < 0.1      | 88                   | 75             | 5          |
| 23                   | 40             | < 0.1      | 56                   | 40             | < 0.1      | 89                   | 78             | 7          |
| 24                   | 40             | < 0.1      | 57                   | 40             | < 0.1      | 90                   | 80             | 9          |
| 25                   | 40             | < 0.1      | 58                   | 40             | < 0.1      | 91                   | 83             | 13         |
| 26                   | 40             | < 0.1      | 59                   | 40             | < 0.1      | 92                   | 85             | 16         |
| 27                   | 40             | < 0.1      | 60                   | 40             | < 0.1      | 93                   | 88             | 21         |
| 28                   | 40             | < 0.1      | 61                   | 40             | < 0.1      | 94                   | 91             | 27         |
| 29                   | 40             | < 0.1      | 62                   | 40             | < 0.1      | 95                   | 93             | 32         |
| 30                   | 40             | < 0.1      | 63                   | 40             | < 0.1      | 96                   | 96             | 39         |
| 31                   | 40             | < 0.1      | 64                   | 40             | < 0.1      | 97                   | 98             | 45         |
| 32                   | 40             | < 0.1      | 65                   | 40             | < 0.1      | 98                   | 101            | 53         |
|                      |                |            |                      |                |            | 99                   | 104            | 61         |
|                      |                |            |                      |                |            | 100                  | 106            | 66         |

**Past Tense Probe Standard Score Conversion Tables: 8;6–8;11**

**Ages 8;6–8;11 (N = 73; boys = 45, girls = 28)**

Confidence Intervals:

68% ± 1.76

90% ± 2.90

95% ± 3.45

| Past Tense Raw Score | Standard Score | Percentile | Past Tense Raw Score | Standard Score | Percentile | Past Tense Raw Score | Standard Score | Percentile |
|----------------------|----------------|------------|----------------------|----------------|------------|----------------------|----------------|------------|
| 0                    | 40             | < 0.1      | 33                   | 40             | < 0.1      | 66                   | 40             | < 0.1      |
| 1                    | 40             | < 0.1      | 34                   | 40             | < 0.1      | 67                   | 40             | < 0.1      |
| 2                    | 40             | < 0.1      | 35                   | 40             | < 0.1      | 68                   | 40             | < 0.1      |
| 3                    | 40             | < 0.1      | 36                   | 40             | < 0.1      | 69                   | 40             | < 0.1      |
| 4                    | 40             | < 0.1      | 37                   | 40             | < 0.1      | 70                   | 40             | < 0.1      |
| 5                    | 40             | < 0.1      | 38                   | 40             | < 0.1      | 71                   | 40             | < 0.1      |
| 6                    | 40             | < 0.1      | 39                   | 40             | < 0.1      | 72                   | 40             | < 0.1      |
| 7                    | 40             | < 0.1      | 40                   | 40             | < 0.1      | 73                   | 40             | < 0.1      |
| 8                    | 40             | < 0.1      | 41                   | 40             | < 0.1      | 74                   | 40             | < 0.1      |
| 9                    | 40             | < 0.1      | 42                   | 40             | < 0.1      | 75                   | 40             | < 0.1      |
| 10                   | 40             | < 0.1      | 43                   | 40             | < 0.1      | 76                   | 40             | < 0.1      |
| 11                   | 40             | < 0.1      | 44                   | 40             | < 0.1      | 77                   | 40             | < 0.1      |
| 12                   | 40             | < 0.1      | 45                   | 40             | < 0.1      | 78                   | 40             | < 0.1      |
| 13                   | 40             | < 0.1      | 46                   | 40             | < 0.1      | 79                   | 40             | < 0.1      |
| 14                   | 40             | < 0.1      | 47                   | 40             | < 0.1      | 80                   | 40             | < 0.1      |
| 15                   | 40             | < 0.1      | 48                   | 40             | < 0.1      | 81                   | 40             | < 0.1      |
| 16                   | 40             | < 0.1      | 49                   | 40             | < 0.1      | 82                   | 40             | < 0.1      |
| 17                   | 40             | < 0.1      | 50                   | 40             | < 0.1      | 83                   | 40             | < 0.1      |
| 18                   | 40             | < 0.1      | 51                   | 40             | < 0.1      | 84                   | 42             | < 0.1      |
| 19                   | 40             | < 0.1      | 52                   | 40             | < 0.1      | 85                   | 46             | < 0.1      |
| 20                   | 40             | < 0.1      | 53                   | 40             | < 0.1      | 86                   | 50             | < 0.1      |
| 21                   | 40             | < 0.1      | 54                   | 40             | < 0.1      | 87                   | 54             | 0.1        |
| 22                   | 40             | < 0.1      | 55                   | 40             | < 0.1      | 88                   | 59             | 0.3        |
| 23                   | 40             | < 0.1      | 56                   | 40             | < 0.1      | 89                   | 63             | 1          |
| 24                   | 40             | < 0.1      | 57                   | 40             | < 0.1      | 90                   | 67             | 1          |
| 25                   | 40             | < 0.1      | 58                   | 40             | < 0.1      | 91                   | 71             | 3          |
| 26                   | 40             | < 0.1      | 59                   | 40             | < 0.1      | 92                   | 75             | 5          |
| 27                   | 40             | < 0.1      | 60                   | 40             | < 0.1      | 93                   | 80             | 9          |
| 28                   | 40             | < 0.1      | 61                   | 40             | < 0.1      | 94                   | 84             | 14         |
| 29                   | 40             | < 0.1      | 62                   | 40             | < 0.1      | 95                   | 88             | 21         |
| 30                   | 40             | < 0.1      | 63                   | 40             | < 0.1      | 96                   | 92             | 30         |
| 31                   | 40             | < 0.1      | 64                   | 40             | < 0.1      | 97                   | 96             | 39         |
| 32                   | 40             | < 0.1      | 65                   | 40             | < 0.1      | 98                   | 101            | 53         |
|                      |                |            |                      |                |            | 99                   | 105            | 63         |
|                      |                |            |                      |                |            | 100                  | 109            | 73         |

**Past Tense Probe Standard Score Conversion Tables: 9;0–9;5**

**Ages 9;0–9;5 (N = 26; boys = 15, girls = 11)**

Confidence Intervals:

68% ± 2.94

90% ± 4.84

95% ± 5.76

| Past Tense Raw Score | Standard Score | Percentile | Past Tense Raw Score | Standard Score | Percentile | Past Tense Raw Score | Standard Score | Percentile |
|----------------------|----------------|------------|----------------------|----------------|------------|----------------------|----------------|------------|
| 0                    | 40             | < 0.1      | 33                   | 40             | < 0.1      | 66                   | 40             | < 0.1      |
| 1                    | 40             | < 0.1      | 34                   | 40             | < 0.1      | 67                   | 40             | < 0.1      |
| 2                    | 40             | < 0.1      | 35                   | 40             | < 0.1      | 68                   | 40             | < 0.1      |
| 3                    | 40             | < 0.1      | 36                   | 40             | < 0.1      | 69                   | 40             | < 0.1      |
| 4                    | 40             | < 0.1      | 37                   | 40             | < 0.1      | 70                   | 40             | < 0.1      |
| 5                    | 40             | < 0.1      | 38                   | 40             | < 0.1      | 71                   | 40             | < 0.1      |
| 6                    | 40             | < 0.1      | 39                   | 40             | < 0.1      | 72                   | 40             | < 0.1      |
| 7                    | 40             | < 0.1      | 40                   | 40             | < 0.1      | 73                   | 40             | < 0.1      |
| 8                    | 40             | < 0.1      | 41                   | 40             | < 0.1      | 74                   | 40             | < 0.1      |
| 9                    | 40             | < 0.1      | 42                   | 40             | < 0.1      | 75                   | 40             | < 0.1      |
| 10                   | 40             | < 0.1      | 43                   | 40             | < 0.1      | 76                   | 40             | < 0.1      |
| 11                   | 40             | < 0.1      | 44                   | 40             | < 0.1      | 77                   | 40             | < 0.1      |
| 12                   | 40             | < 0.1      | 45                   | 40             | < 0.1      | 78                   | 40             | < 0.1      |
| 13                   | 40             | < 0.1      | 46                   | 40             | < 0.1      | 79                   | 40             | < 0.1      |
| 14                   | 40             | < 0.1      | 47                   | 40             | < 0.1      | 80                   | 40             | < 0.1      |
| 15                   | 40             | < 0.1      | 48                   | 40             | < 0.1      | 81                   | 40             | < 0.1      |
| 16                   | 40             | < 0.1      | 49                   | 40             | < 0.1      | 82                   | 40             | < 0.1      |
| 17                   | 40             | < 0.1      | 50                   | 40             | < 0.1      | 83                   | 40             | < 0.1      |
| 18                   | 40             | < 0.1      | 51                   | 40             | < 0.1      | 84                   | 40             | < 0.1      |
| 19                   | 40             | < 0.1      | 52                   | 40             | < 0.1      | 85                   | 40             | < 0.1      |
| 20                   | 40             | < 0.1      | 53                   | 40             | < 0.1      | 86                   | 40             | < 0.1      |
| 21                   | 40             | < 0.1      | 54                   | 40             | < 0.1      | 87                   | 40             | < 0.1      |
| 22                   | 40             | < 0.1      | 55                   | 40             | < 0.1      | 88                   | 40             | < 0.1      |
| 23                   | 40             | < 0.1      | 56                   | 40             | < 0.1      | 89                   | 42             | < 0.1      |
| 24                   | 40             | < 0.1      | 57                   | 40             | < 0.1      | 90                   | 47             | < 0.1      |
| 25                   | 40             | < 0.1      | 58                   | 40             | < 0.1      | 91                   | 53             | 0.1        |
| 26                   | 40             | < 0.1      | 59                   | 40             | < 0.1      | 92                   | 59             | 0.3        |
| 27                   | 40             | < 0.1      | 60                   | 40             | < 0.1      | 93                   | 65             | 1          |
| 28                   | 40             | < 0.1      | 61                   | 40             | < 0.1      | 94                   | 70             | 2          |
| 29                   | 40             | < 0.1      | 62                   | 40             | < 0.1      | 95                   | 76             | 5          |
| 30                   | 40             | < 0.1      | 63                   | 40             | < 0.1      | 96                   | 82             | 12         |
| 31                   | 40             | < 0.1      | 64                   | 40             | < 0.1      | 97                   | 87             | 19         |
| 32                   | 40             | < 0.1      | 65                   | 40             | < 0.1      | 98                   | 93             | 32         |
|                      |                |            |                      |                |            | 99                   | 99             | 47         |
|                      |                |            |                      |                |            | 100                  | 105            | 63         |
