# Supplementary material for: Diagnostic Accuracy of Sentence Recall and Past Tense Measures for Identifying Children's Language Impairments
Source: PubMed Central journal article supplement — J Speech Lang Hear Res. 2019 Jun 20;62(7):2438–54. doi: 10.1044/2019_JSLHR-L-18-0388 (PMC6808358; doi:10.1044/2019_jslhr-l-18-0388), 2019-06-20
Supplement: JSLHR-62-2438-s003.pdf [file JSLHR-62-2438-s003.pdf]

### Supplemental Material S3. Nonword Repetition Task (NWR; Dollaghan & Campbell, 1998).

#### Demographics

Norms for Nonword Repetition Task (NWR; Dollaghan & Campbell, 1998) included children who were attending regular education only. Children were excluded from the standardization sample if they were receiving any special education services (e.g., resource, reading, speech-language services), receiving English as a second language service, participated in an extended learning program, or had been diagnosed with ASD, ADHD, or a psychiatric disorder.

| Ethnic Category          | Females           | Males             | Total       |
|--------------------------|-------------------|-------------------|-------------|
| Hispanic                 | 2 (3.4%)          | 3 (4.1%)          | 5 (3.8%)    |
| Not Hispanic             | 57 (96.6%)        | 67 (91.8%)        | 124 (93.9%) |
| Unknown                  | —                 | 3 (4.1%)          | 3 (2.3%)    |
| <b>ETHNIC TOTAL</b>      | <b>59 (44.7%)</b> | <b>73 (55.3%)</b> | <b>132</b>  |
| <b>Racial Categories</b> |                   |                   |             |
| American Indian          | —                 | 1 (1.4%)          | 1 (0.8%)    |
| Asian                    | 2 (3.4%)          | 4 (5.5%)          | 6 (4.5%)    |
| Pacific Islander         | —                 | 2 (2.7%)          | 2 (1.5%)    |
| Black                    | 3 (5.1%)          | 1 (1.4%)          | 4 (3.0%)    |
| White                    | 54 (91.5%)        | 62 (84.9%)        | 116 (87.9%) |
| More than one race       | —                 | —                 | —           |
| Unknown                  | —                 | 3 (4.1%)          | 3 (2.3%)    |
| <b>RACIAL TOTAL</b>      | <b>59 (44.7%)</b> | <b>73 (55.3%)</b> | <b>132</b>  |

#### NWR Consistency

Interrater consistency was performed by randomly selecting 36 participants from the Redmond standardization sample and re-listening and re-scoring the audio recording of the NWR administration. Analyzed using Pearson’s *r*.

$n = 36$

|            | #agreements / (#agreements + #disagreements) × 100 | <i>r</i> |
|------------|----------------------------------------------------|----------|
| <b>NWR</b> | 96.67%                                             | .89**    |

\* $p < .05$ . \*\* $p < .01$ . \*\*\* $p < .001$  (two tailed).

#### NWR ( $n = 132$ ) Raw Scores

| AGE      | <i>N</i> | <i>M</i> | <i>SD</i> | RANGE  | 15 <sup>TH</sup><br>%ILE | 10 <sup>TH</sup><br>%ILE | 5 <sup>TH</sup><br>%ILE |
|----------|----------|----------|-----------|--------|--------------------------|--------------------------|-------------------------|
| 5:0–5;11 | 20       | 84.00    | 6.94      | 72–98  | 76.15                    | 75.10                    | 72.15                   |
| 6:0–6;11 | 30       | 86.20    | 9.03      | 59–96  | 75.60                    | 71.20                    | 65.05                   |
| 7:0–7;11 | 33       | 88.79    | 6.25      | 77–98  | 79.00                    | 78.00                    | 77.00                   |
| 8:0–8;11 | 37       | 90.41    | 5.55      | 79–99  | 83.70                    | 82.20                    | 79.00                   |
| 9:0–9;11 | 12       | 92.42    | 5.09      | 82–100 | 85.80                    | 83.20                    | 82.00                   |

**NWR standard score conversion tables: 5;0–5;11**

*n* = 20 (11 boys, 9 girls)

| Raw Score | Standard Score | Percentile | Raw Score | Standard Score | Percentile | Raw Score | Standard Score | Percentile |
|-----------|----------------|------------|-----------|----------------|------------|-----------|----------------|------------|
| 0         | 40             | < 0.1      | 40        | 40             | < 0.1      | 80        | 91             | 27         |
| 1         | 40             | < 0.1      | 41        | 40             | < 0.1      | 81        | 93             | 32         |
| 2         | 40             | < 0.1      | 42        | 40             | < 0.1      | 82        | 95             | 37         |
| 3         | 40             | < 0.1      | 43        | 40             | < 0.1      | 83        | 97             | 42         |
| 4         | 40             | < 0.1      | 44        | 40             | < 0.1      | 84        | 100            | 50         |
| 5         | 40             | < 0.1      | 45        | 40             | < 0.1      | 85        | 102            | 55         |
| 6         | 40             | < 0.1      | 46        | 40             | < 0.1      | 86        | 104            | 61         |
| 7         | 40             | < 0.1      | 47        | 40             | < 0.1      | 87        | 106            | 66         |
| 8         | 40             | < 0.1      | 48        | 40             | < 0.1      | 88        | 108            | 70         |
| 9         | 40             | < 0.1      | 49        | 40             | < 0.1      | 89        | 110            | 75         |
| 10        | 40             | < 0.1      | 50        | 40             | < 0.1      | 90        | 112            | 79         |
| 11        | 40             | < 0.1      | 51        | 40             | < 0.1      | 91        | 115            | 84         |
| 12        | 40             | < 0.1      | 52        | 40             | < 0.1      | 92        | 117            | 87         |
| 13        | 40             | < 0.1      | 53        | 40             | < 0.1      | 93        | 119            | 90         |
| 14        | 40             | < 0.1      | 54        | 40             | < 0.1      | 94        | 121            | 92         |
| 15        | 40             | < 0.1      | 55        | 40             | < 0.1      | 95        | 123            | 94         |
| 16        | 40             | < 0.1      | 56        | 40             | < 0.1      | 96        | 125            | 95         |
| 17        | 40             | < 0.1      | 57        | 41             | < 0.1      | 97        | 128            | 97         |
| 18        | 40             | < 0.1      | 58        | 43             | < 0.1      | 98        | 130            | 98         |
| 19        | 40             | < 0.1      | 59        | 45             | < 0.1      | 99        | 132            | 98         |
| 20        | 40             | < 0.1      | 60        | 48             | < 0.1      | 100       | 134            | 99         |
| 21        | 40             | < 0.1      | 61        | 50             | < 0.1      |           |                |            |
| 22        | 40             | < 0.1      | 62        | 52             | 0.1        |           |                |            |
| 23        | 40             | < 0.1      | 63        | 54             | 0.1        |           |                |            |
| 24        | 40             | < 0.1      | 64        | 56             | 0.1        |           |                |            |
| 25        | 40             | < 0.1      | 65        | 58             | 0.2        |           |                |            |
| 26        | 40             | < 0.1      | 66        | 61             | 0.5        |           |                |            |
| 27        | 40             | < 0.1      | 67        | 63             | 1          |           |                |            |
| 28        | 40             | < 0.1      | 68        | 65             | 1          |           |                |            |
| 29        | 40             | < 0.1      | 69        | 67             | 1          |           |                |            |
| 30        | 40             | < 0.1      | 70        | 69             | 2          |           |                |            |
| 31        | 40             | < 0.1      | 71        | 71             | 3          |           |                |            |
| 32        | 40             | < 0.1      | 72        | 74             | 4          |           |                |            |
| 33        | 40             | < 0.1      | 73        | 76             | 5          |           |                |            |
| 34        | 40             | < 0.1      | 74        | 78             | 7          |           |                |            |
| 35        | 40             | < 0.1      | 75        | 80             | 9          |           |                |            |
| 36        | 40             | < 0.1      | 76        | 82             | 12         |           |                |            |
| 37        | 40             | < 0.1      | 77        | 84             | 14         |           |                |            |
| 38        | 40             | < 0.1      | 78        | 87             | 19         |           |                |            |
| 39        | 40             | < 0.1      | 79        | 89             | 23         |           |                |            |

**NWR standard score conversion tables: 6;0–6;11**

*n* = 30 (14 boys, 16 girls)

| Raw Score | Standard Score | Percentile | Raw Score | Standard Score | Percentile | Raw Score | Standard Score | Percentile |
|-----------|----------------|------------|-----------|----------------|------------|-----------|----------------|------------|
| 0         | 40             | < 0.1      | 40        | 40             | < 0.1      | 80        | 89             | 23         |
| 1         | 40             | < 0.1      | 41        | 40             | < 0.1      | 81        | 91             | 27         |
| 2         | 40             | < 0.1      | 42        | 40             | < 0.1      | 82        | 93             | 32         |
| 3         | 40             | < 0.1      | 43        | 40             | < 0.1      | 83        | 94             | 34         |
| 4         | 40             | < 0.1      | 44        | 40             | < 0.1      | 84        | 96             | 40         |
| 5         | 40             | < 0.1      | 45        | 40             | < 0.1      | 85        | 98             | 45         |
| 6         | 40             | < 0.1      | 46        | 40             | < 0.1      | 86        | 99             | 47         |
| 7         | 40             | < 0.1      | 47        | 40             | < 0.1      | 87        | 101            | 53         |
| 8         | 40             | < 0.1      | 48        | 40             | < 0.1      | 88        | 102            | 55         |
| 9         | 40             | < 0.1      | 49        | 40             | < 0.1      | 89        | 104            | 61         |
| 10        | 40             | < 0.1      | 50        | 40             | < 0.1      | 90        | 106            | 66         |
| 11        | 40             | < 0.1      | 51        | 41             | < 0.1      | 91        | 107            | 68         |
| 12        | 40             | < 0.1      | 52        | 43             | < 0.1      | 92        | 109            | 73         |
| 13        | 40             | < 0.1      | 53        | 44             | < 0.1      | 93        | 111            | 77         |
| 14        | 40             | < 0.1      | 54        | 46             | < 0.1      | 94        | 112            | 79         |
| 15        | 40             | < 0.1      | 55        | 48             | < 0.1      | 95        | 114            | 82         |
| 16        | 40             | < 0.1      | 56        | 49             | < 0.1      | 96        | 116            | 86         |
| 17        | 40             | < 0.1      | 57        | 51             | < 0.1      | 97        | 117            | 87         |
| 18        | 40             | < 0.1      | 58        | 53             | 0.1        | 98        | 119            | 90         |
| 19        | 40             | < 0.1      | 59        | 54             | 0.1        | 99        | 121            | 92         |
| 20        | 40             | < 0.1      | 60        | 56             | 0.1        | 100       | 122            | 93         |
| 21        | 40             | < 0.1      | 61        | 58             | 0.2        |           |                |            |
| 22        | 40             | < 0.1      | 62        | 59             | 0.3        |           |                |            |
| 23        | 40             | < 0.1      | 63        | 61             | 0.5        |           |                |            |
| 24        | 40             | < 0.1      | 64        | 63             | 1          |           |                |            |
| 25        | 40             | < 0.1      | 65        | 64             | 1          |           |                |            |
| 26        | 40             | < 0.1      | 66        | 66             | 1          |           |                |            |
| 27        | 40             | < 0.1      | 67        | 68             | 2          |           |                |            |
| 28        | 40             | < 0.1      | 68        | 69             | 2          |           |                |            |
| 29        | 40             | < 0.1      | 69        | 71             | 3          |           |                |            |
| 30        | 40             | < 0.1      | 70        | 73             | 4          |           |                |            |
| 31        | 40             | < 0.1      | 71        | 74             | 4          |           |                |            |
| 32        | 40             | < 0.1      | 72        | 76             | 5          |           |                |            |
| 33        | 40             | < 0.1      | 73        | 78             | 7          |           |                |            |
| 34        | 40             | < 0.1      | 74        | 79             | 8          |           |                |            |
| 35        | 40             | < 0.1      | 75        | 81             | 10         |           |                |            |
| 36        | 40             | < 0.1      | 76        | 83             | 13         |           |                |            |
| 37        | 40             | < 0.1      | 77        | 84             | 14         |           |                |            |
| 38        | 40             | < 0.1      | 78        | 86             | 18         |           |                |            |
| 39        | 40             | < 0.1      | 79        | 88             | 21         |           |                |            |

**NWR standard score conversion tables: 7;0–7;11**

*n* = 33 (15 boys, 18 girls)

| Raw Score | Standard Score | Percentile | Raw Score | Standard Score | Percentile | Raw Score | Standard Score | Percentile |
|-----------|----------------|------------|-----------|----------------|------------|-----------|----------------|------------|
| 0         | 40             | < 0.1      | 40        | 40             | < 0.1      | 80        | 78             | 7          |
| 1         | 40             | < 0.1      | 41        | 40             | < 0.1      | 81        | 81             | 10         |
| 2         | 40             | < 0.1      | 42        | 40             | < 0.1      | 82        | 83             | 13         |
| 3         | 40             | < 0.1      | 43        | 40             | < 0.1      | 83        | 86             | 18         |
| 4         | 40             | < 0.1      | 44        | 40             | < 0.1      | 84        | 88             | 21         |
| 5         | 40             | < 0.1      | 45        | 40             | < 0.1      | 85        | 90             | 25         |
| 6         | 40             | < 0.1      | 46        | 40             | < 0.1      | 86        | 93             | 32         |
| 7         | 40             | < 0.1      | 47        | 40             | < 0.1      | 87        | 95             | 37         |
| 8         | 40             | < 0.1      | 48        | 40             | < 0.1      | 88        | 98             | 45         |
| 9         | 40             | < 0.1      | 49        | 40             | < 0.1      | 89        | 100            | 50         |
| 10        | 40             | < 0.1      | 50        | 40             | < 0.1      | 90        | 102            | 55         |
| 11        | 40             | < 0.1      | 51        | 40             | < 0.1      | 91        | 105            | 63         |
| 12        | 40             | < 0.1      | 52        | 40             | < 0.1      | 92        | 107            | 68         |
| 13        | 40             | < 0.1      | 53        | 40             | < 0.1      | 93        | 110            | 75         |
| 14        | 40             | < 0.1      | 54        | 40             | < 0.1      | 94        | 112            | 79         |
| 15        | 40             | < 0.1      | 55        | 40             | < 0.1      | 95        | 114            | 82         |
| 16        | 40             | < 0.1      | 56        | 40             | < 0.1      | 96        | 117            | 87         |
| 17        | 40             | < 0.1      | 57        | 40             | < 0.1      | 97        | 119            | 90         |
| 18        | 40             | < 0.1      | 58        | 40             | < 0.1      | 98        | 122            | 93         |
| 19        | 40             | < 0.1      | 59        | 40             | < 0.1      | 99        | 124            | 95         |
| 20        | 40             | < 0.1      | 60        | 40             | < 0.1      | 100       | 126            | 96         |
| 21        | 40             | < 0.1      | 61        | 40             | < 0.1      |           |                |            |
| 22        | 40             | < 0.1      | 62        | 40             | < 0.1      |           |                |            |
| 23        | 40             | < 0.1      | 63        | 40             | < 0.1      |           |                |            |
| 24        | 40             | < 0.1      | 64        | 40             | < 0.1      |           |                |            |
| 25        | 40             | < 0.1      | 65        | 42             | < 0.1      |           |                |            |
| 26        | 40             | < 0.1      | 66        | 45             | < 0.1      |           |                |            |
| 27        | 40             | < 0.1      | 67        | 47             | < 0.1      |           |                |            |
| 28        | 40             | < 0.1      | 68        | 50             | < 0.1      |           |                |            |
| 29        | 40             | < 0.1      | 69        | 52             | 0.1        |           |                |            |
| 30        | 40             | < 0.1      | 70        | 54             | 0.1        |           |                |            |
| 31        | 40             | < 0.1      | 71        | 57             | 0.1        |           |                |            |
| 32        | 40             | < 0.1      | 72        | 59             | 0.3        |           |                |            |
| 33        | 40             | < 0.1      | 73        | 62             | 1          |           |                |            |
| 34        | 40             | < 0.1      | 74        | 64             | 1          |           |                |            |
| 35        | 40             | < 0.1      | 75        | 66             | 1          |           |                |            |
| 36        | 40             | < 0.1      | 76        | 69             | 2          |           |                |            |
| 37        | 40             | < 0.1      | 77        | 71             | 3          |           |                |            |
| 38        | 40             | < 0.1      | 78        | 74             | 4          |           |                |            |
| 39        | 40             | < 0.1      | 79        | 76             | 5          |           |                |            |

**NWR standard score conversion tables: 8;0–8;11**

*n* = 37 (22 boys, 15 girls)

| Raw Score | Standard Score | Percentile | Raw Score | Standard Score | Percentile | Raw Score | Standard Score | Percentile |
|-----------|----------------|------------|-----------|----------------|------------|-----------|----------------|------------|
| 0         | 40             | < 0.1      | 40        | 40             | < 0.1      | 80        | 71             | 3          |
| 1         | 40             | < 0.1      | 41        | 40             | < 0.1      | 81        | 74             | 4          |
| 2         | 40             | < 0.1      | 42        | 40             | < 0.1      | 82        | 77             | 6          |
| 3         | 40             | < 0.1      | 43        | 40             | < 0.1      | 83        | 79             | 8          |
| 4         | 40             | < 0.1      | 44        | 40             | < 0.1      | 84        | 82             | 12         |
| 5         | 40             | < 0.1      | 45        | 40             | < 0.1      | 85        | 85             | 16         |
| 6         | 40             | < 0.1      | 46        | 40             | < 0.1      | 86        | 88             | 21         |
| 7         | 40             | < 0.1      | 47        | 40             | < 0.1      | 87        | 90             | 25         |
| 8         | 40             | < 0.1      | 48        | 40             | < 0.1      | 88        | 93             | 32         |
| 9         | 40             | < 0.1      | 49        | 40             | < 0.1      | 89        | 96             | 40         |
| 10        | 40             | < 0.1      | 50        | 40             | < 0.1      | 90        | 98             | 45         |
| 11        | 40             | < 0.1      | 51        | 40             | < 0.1      | 91        | 101            | 53         |
| 12        | 40             | < 0.1      | 52        | 40             | < 0.1      | 92        | 104            | 61         |
| 13        | 40             | < 0.1      | 53        | 40             | < 0.1      | 93        | 107            | 68         |
| 14        | 40             | < 0.1      | 54        | 40             | < 0.1      | 94        | 109            | 73         |
| 15        | 40             | < 0.1      | 55        | 40             | < 0.1      | 95        | 112            | 79         |
| 16        | 40             | < 0.1      | 56        | 40             | < 0.1      | 96        | 115            | 84         |
| 17        | 40             | < 0.1      | 57        | 40             | < 0.1      | 97        | 117            | 87         |
| 18        | 40             | < 0.1      | 58        | 40             | < 0.1      | 98        | 120            | 91         |
| 19        | 40             | < 0.1      | 59        | 40             | < 0.1      | 99        | 123            | 94         |
| 20        | 40             | < 0.1      | 60        | 40             | < 0.1      | 100       | 125            | 95         |
| 21        | 40             | < 0.1      | 61        | 40             | < 0.1      |           |                |            |
| 22        | 40             | < 0.1      | 62        | 40             | < 0.1      |           |                |            |
| 23        | 40             | < 0.1      | 63        | 40             | < 0.1      |           |                |            |
| 24        | 40             | < 0.1      | 64        | 40             | < 0.1      |           |                |            |
| 25        | 40             | < 0.1      | 65        | 40             | < 0.1      |           |                |            |
| 26        | 40             | < 0.1      | 66        | 40             | < 0.1      |           |                |            |
| 27        | 40             | < 0.1      | 67        | 40             | < 0.1      |           |                |            |
| 28        | 40             | < 0.1      | 68        | 40             | < 0.1      |           |                |            |
| 29        | 40             | < 0.1      | 69        | 42             | < 0.1      |           |                |            |
| 30        | 40             | < 0.1      | 70        | 44             | < 0.1      |           |                |            |
| 31        | 40             | < 0.1      | 71        | 47             | < 0.1      |           |                |            |
| 32        | 40             | < 0.1      | 72        | 50             | < 0.1      |           |                |            |
| 33        | 40             | < 0.1      | 73        | 52             | 0.1        |           |                |            |
| 34        | 40             | < 0.1      | 74        | 55             | 0.1        |           |                |            |
| 35        | 40             | < 0.1      | 75        | 58             | 0.2        |           |                |            |
| 36        | 40             | < 0.1      | 76        | 61             | 0.5        |           |                |            |
| 37        | 40             | < 0.1      | 77        | 63             | 1          |           |                |            |
| 38        | 40             | < 0.1      | 78        | 66             | 1          |           |                |            |
| 39        | 40             | < 0.1      | 79        | 69             | 2          |           |                |            |

**NWR standard score conversion tables: 9;0–9;11**

*n* = 12 (11 boys, 1 girl)

| Raw Score | Standard Score | Percentile | Raw Score | Standard Score | Percentile | Raw Score | Standard Score | Percentile |
|-----------|----------------|------------|-----------|----------------|------------|-----------|----------------|------------|
| 0         | 40             | < 0.1      | 40        | 40             | < 0.1      | 80        | 63             | 1          |
| 1         | 40             | < 0.1      | 41        | 40             | < 0.1      | 81        | 66             | 1          |
| 2         | 40             | < 0.1      | 42        | 40             | < 0.1      | 82        | 69             | 2          |
| 3         | 40             | < 0.1      | 43        | 40             | < 0.1      | 83        | 72             | 3          |
| 4         | 40             | < 0.1      | 44        | 40             | < 0.1      | 84        | 75             | 5          |
| 5         | 40             | < 0.1      | 45        | 40             | < 0.1      | 85        | 78             | 7          |
| 6         | 40             | < 0.1      | 46        | 40             | < 0.1      | 86        | 81             | 10         |
| 7         | 40             | < 0.1      | 47        | 40             | < 0.1      | 87        | 84             | 14         |
| 8         | 40             | < 0.1      | 48        | 40             | < 0.1      | 88        | 86             | 18         |
| 9         | 40             | < 0.1      | 49        | 40             | < 0.1      | 89        | 89             | 23         |
| 10        | 40             | < 0.1      | 50        | 40             | < 0.1      | 90        | 92             | 30         |
| 11        | 40             | < 0.1      | 51        | 40             | < 0.1      | 91        | 95             | 37         |
| 12        | 40             | < 0.1      | 52        | 40             | < 0.1      | 92        | 98             | 45         |
| 13        | 40             | < 0.1      | 53        | 40             | < 0.1      | 93        | 101            | 53         |
| 14        | 40             | < 0.1      | 54        | 40             | < 0.1      | 94        | 104            | 61         |
| 15        | 40             | < 0.1      | 55        | 40             | < 0.1      | 95        | 107            | 68         |
| 16        | 40             | < 0.1      | 56        | 40             | < 0.1      | 96        | 110            | 75         |
| 17        | 40             | < 0.1      | 57        | 40             | < 0.1      | 97        | 113            | 81         |
| 18        | 40             | < 0.1      | 58        | 40             | < 0.1      | 98        | 116            | 86         |
| 19        | 40             | < 0.1      | 59        | 40             | < 0.1      | 99        | 119            | 90         |
| 20        | 40             | < 0.1      | 60        | 40             | < 0.1      | 100       | 122            | 93         |
| 21        | 40             | < 0.1      | 61        | 40             | < 0.1      |           |                |            |
| 22        | 40             | < 0.1      | 62        | 40             | < 0.1      |           |                |            |
| 23        | 40             | < 0.1      | 63        | 40             | < 0.1      |           |                |            |
| 24        | 40             | < 0.1      | 64        | 40             | < 0.1      |           |                |            |
| 25        | 40             | < 0.1      | 65        | 40             | < 0.1      |           |                |            |
| 26        | 40             | < 0.1      | 66        | 40             | < 0.1      |           |                |            |
| 27        | 40             | < 0.1      | 67        | 40             | < 0.1      |           |                |            |
| 28        | 40             | < 0.1      | 68        | 40             | < 0.1      |           |                |            |
| 29        | 40             | < 0.1      | 69        | 40             | < 0.1      |           |                |            |
| 30        | 40             | < 0.1      | 70        | 40             | < 0.1      |           |                |            |
| 31        | 40             | < 0.1      | 71        | 40             | < 0.1      |           |                |            |
| 32        | 40             | < 0.1      | 72        | 40             | < 0.1      |           |                |            |
| 33        | 40             | < 0.1      | 73        | 42             | < 0.1      |           |                |            |
| 34        | 40             | < 0.1      | 74        | 45             | < 0.1      |           |                |            |
| 35        | 40             | < 0.1      | 75        | 48             | < 0.1      |           |                |            |
| 36        | 40             | < 0.1      | 76        | 51             | < 0.1      |           |                |            |
| 37        | 40             | < 0.1      | 77        | 54             | 0.1        |           |                |            |
| 38        | 40             | < 0.1      | 78        | 57             | 0.1        |           |                |            |
| 39        | 40             | < 0.1      | 79        | 60             | 0.4        |           |                |            |

**Reference**

Dollaghan, C., & Campbell, T. F. (1998). Nonword repetition and child language impairment. *Journal of Speech, Language, and Hearing Research, 41*, 1136–2246.
